# Supplementary material for: Therapeutic Mechanism and Key Active Ingredients of Shenfu Injection in Sepsis: A Network Pharmacology and Molecular Docking Approach
Source: Hindawi journal article supplement (doi:10.1155/2022/9686149), 2022-08-26
Supplement: f1 [file 9686149.f1.pdf]

Supplementary Table S1 | Binding energies of protein targets docked with SFI active ingredients and standard molecules.

| Compound           | Binding energy/ (kcal/mol) |       |      |        |
|--------------------|----------------------------|-------|------|--------|
|                    | IL-2                       | BCHE  | AKT1 | LGALS3 |
| Songorine          | -7.5                       | -8.9  | -8.0 | -6.6   |
| Ginsenoside Rf     | -7.9                       | -9.0  | -7.7 | -6.4   |
| Ginsenoside Re     | -7.5                       | -10.6 | -7.6 | -7.2   |
| Karacoline         | -7.2                       | -8.6  | -7.3 | -6.3   |
| Standard molecules | -6.5                       | -6.7  | -7.6 | -6.6   |
